# Supplementary material for: Comparative metabolomics reveals organ-specific discrepancy in TCMSP-predicted bioactive ingredients between two geographically distinct regions of Rehmannia chingii
Source: PeerJ journal article supplement (doi:10.7717/peerj.20722), 2026-02-03

**A****TML vs SWL**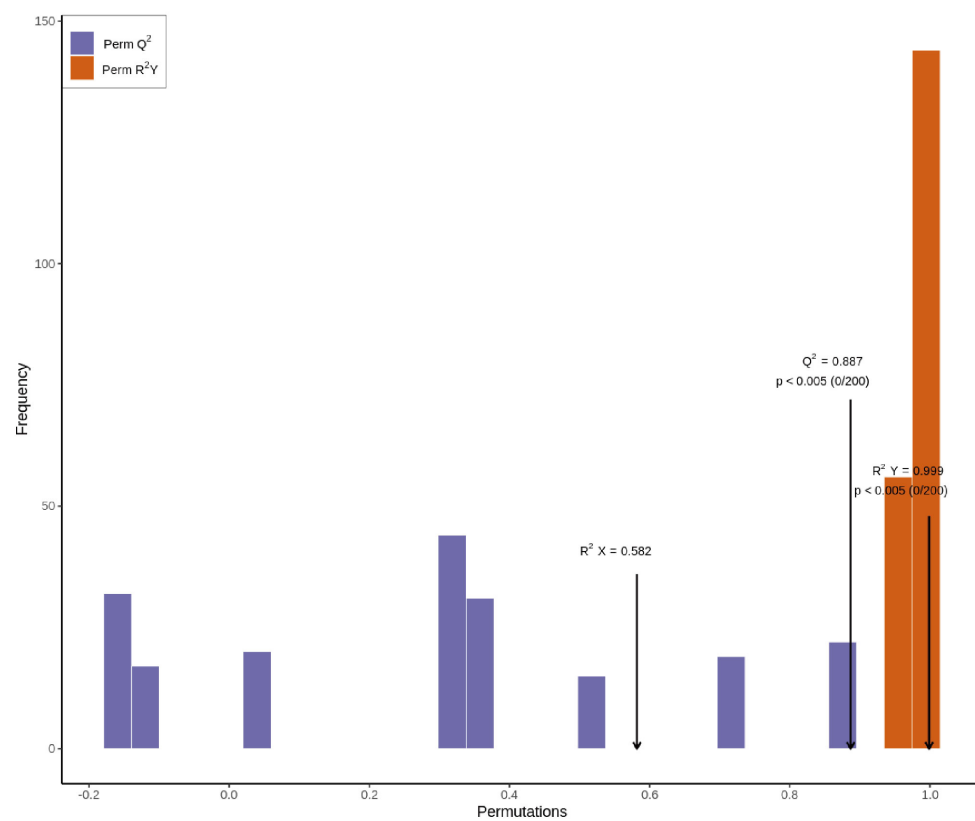**B****TMR vs SWR**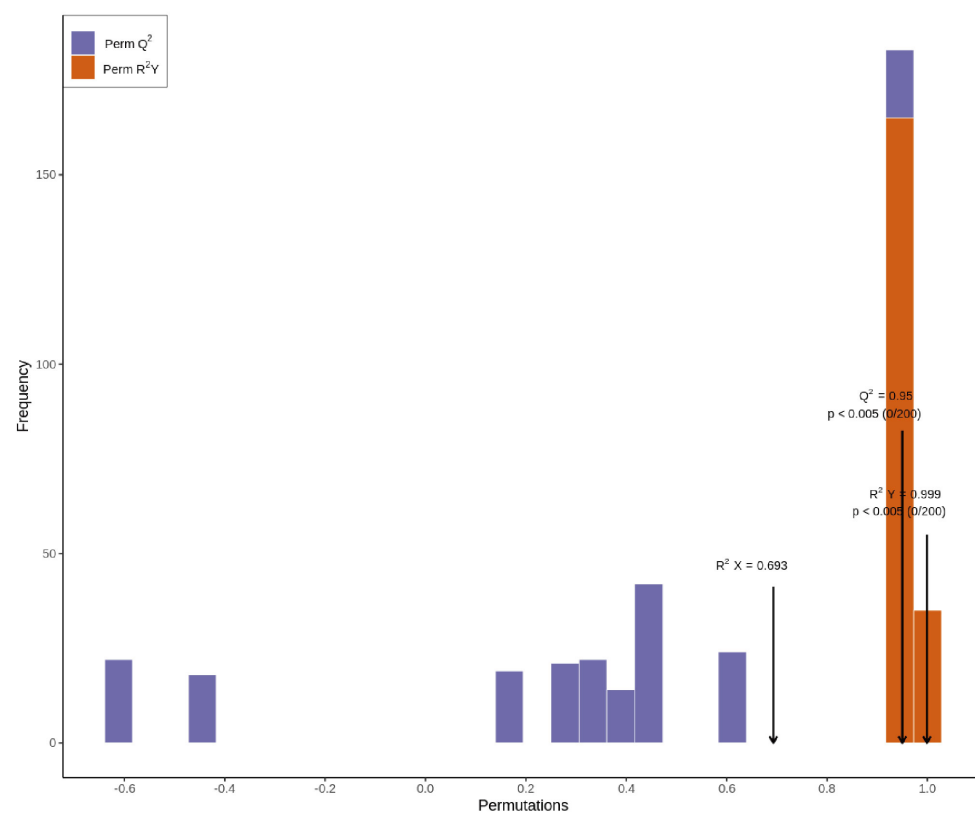**C****SWL vs SWR**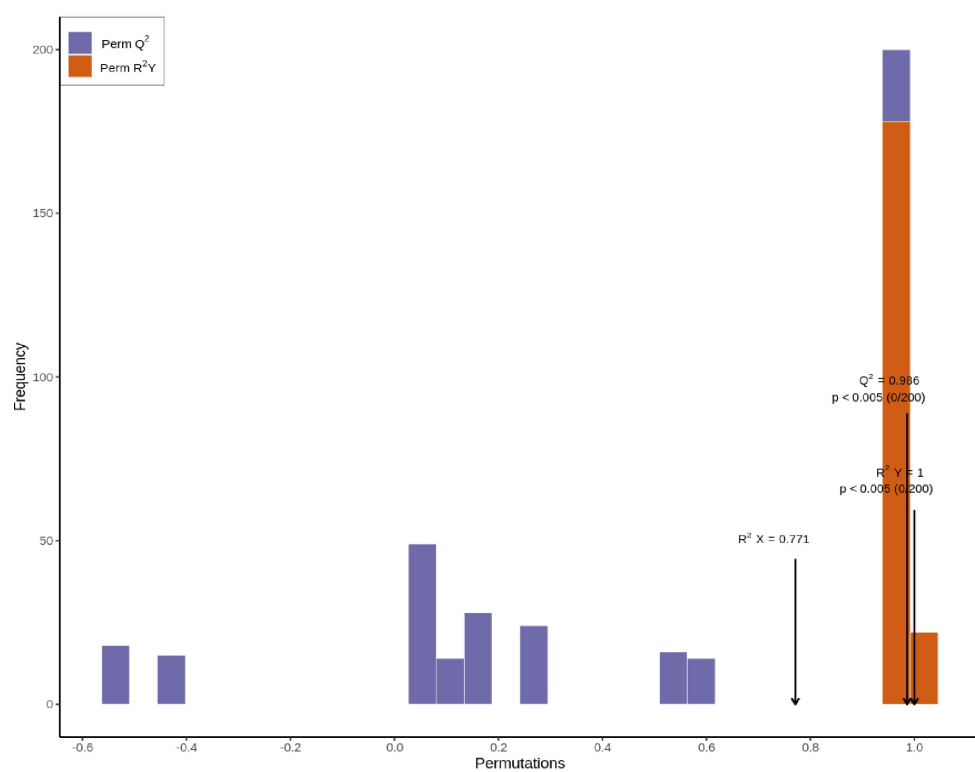**D****TML vs TMR**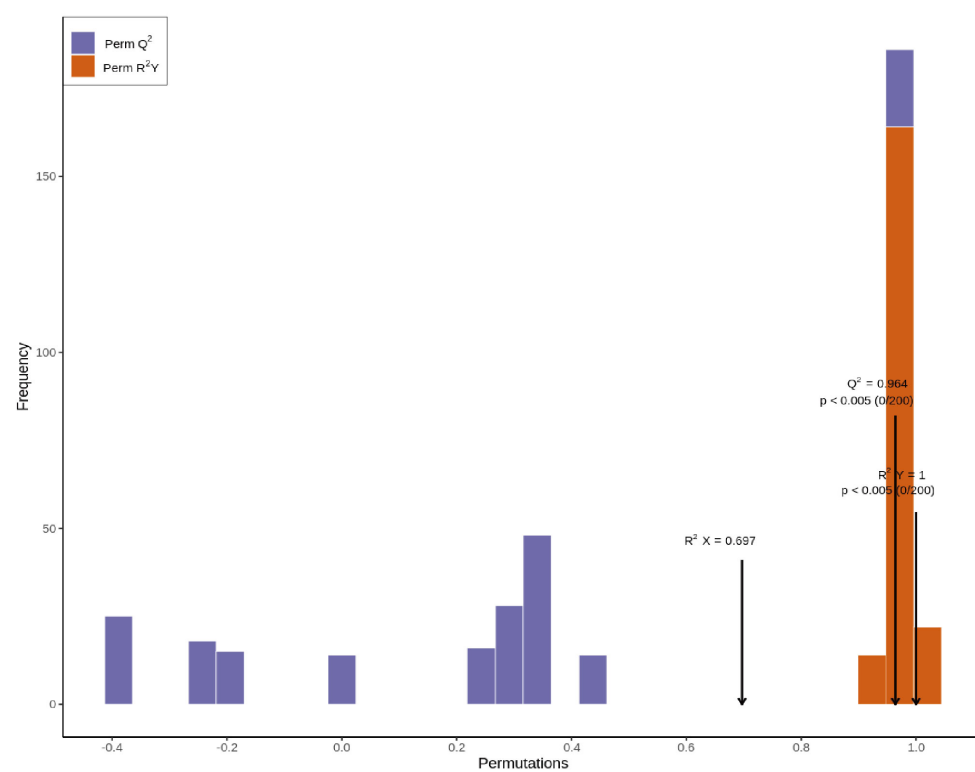

Supplement: FigS1.pdf [file FigS1.pdf]
